# Supplementary material for: Pro-α-cell-derived β-cells contribute to β-cell neogenesis induced by antagonistic glucagon receptor antibody in type 2 diabetic mice
Source: PubMed Central journal article supplement — iScience. 2022 Jun 9;25(7):104567. doi: 10.1016/j.isci.2022.104567 (PMC9249614; doi:10.1016/j.isci.2022.104567), 2022-06-09
Supplement: mmc1.pdf [file mmc1.pdf]

**Supplemental information**

**Pro- $\alpha$ -cell-derived  $\beta$ -cells contribute to  $\beta$ -cell neogenesis  
induced by antagonistic glucagon receptor  
antibody in type 2 diabetic mice**

**Xiaona Cui, Jin Feng, Tianjiao Wei, Liangbiao Gu, Dandan Wang, Shan Lang, Kun  
Yang, Jin Yang, Hai Yan, Rui Wei, and Tianpei Hong**

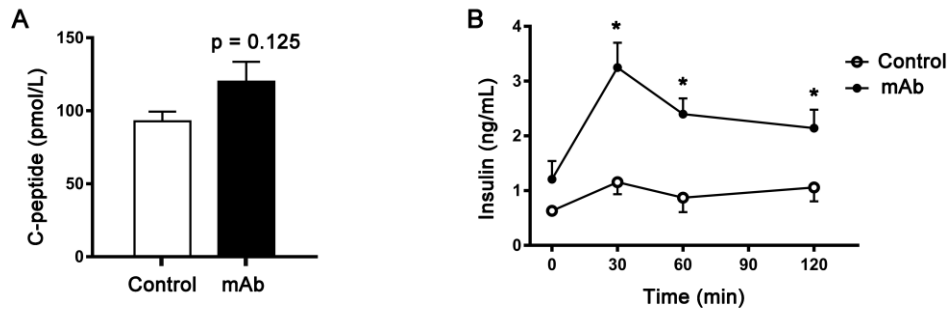

**Figure S1. Plasma C-peptide and insulin levels in HFD + STZ-induced T2D mice treated with GCGR mAb or IgG control for 4 weeks, related to Figure 1.**

(A) Fasting plasma C-peptide.

(B) Plasma insulin levels during the intraperitoneal glucose tolerance test.

n = 6 in control group and n = 9 in GCGR mAb group. Data represent the mean  $\pm$  SEM. Statistical analysis was conducted by Student's *t*-test. \*p < 0.05 vs. control.

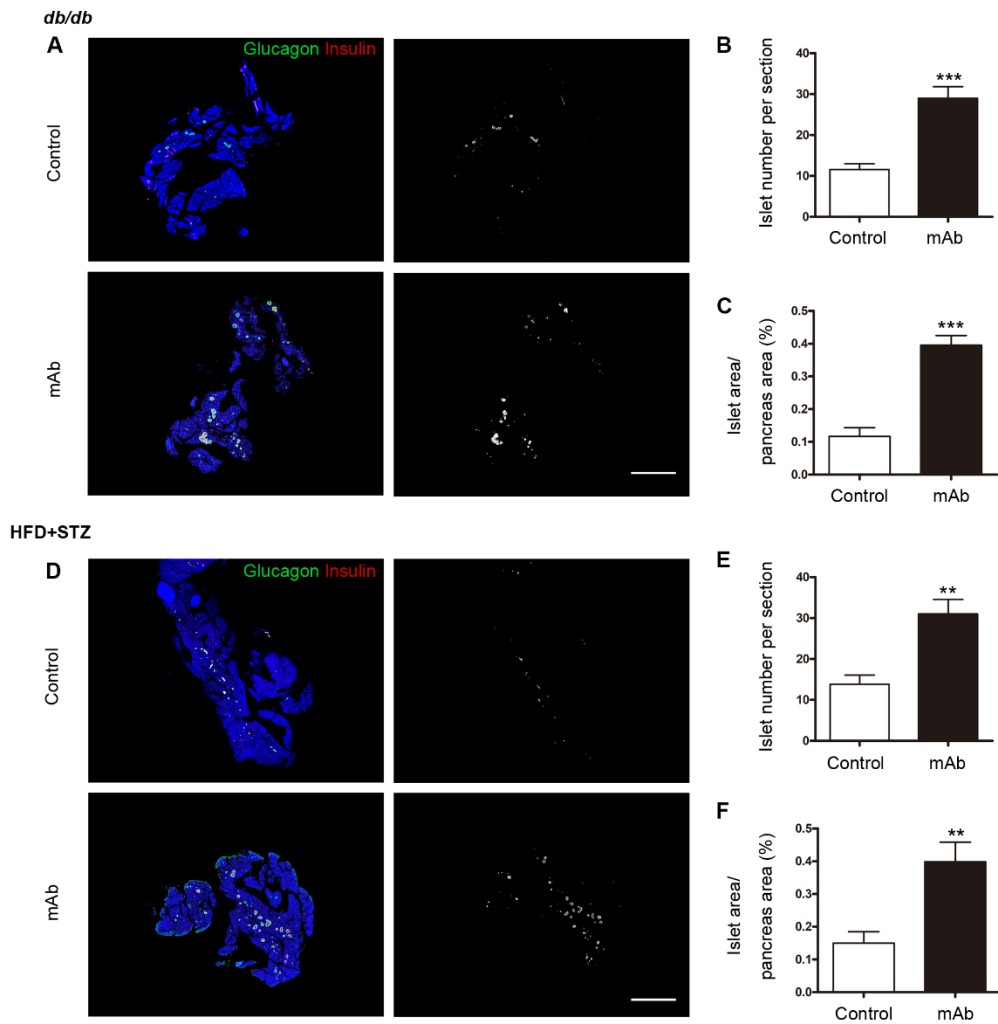

**Figure S2. Histological analysis of the entire pancreata of two T2D mouse models treated with GCGR mAb or IgG control for 4 weeks, related to Figure 2.**

(A, D) Left panels: representative images of the whole pancreata immunostained for glucagon (green) and insulin (red) in *db/db* mice (A) and HFD + STZ-induced T2D mice (D). Right panels: immunostaining in the same tissues as the left panels was transformed into monochrome images, and the cells immunolabeled positively for either glucagon or insulin are displayed in white. Scale bar = 2,000  $\mu$ m.

(B, C) Quantification of the islet number (B) and islet area (C) per pancreatic section in *db/db* mice.  $n = 3$  sections/mouse multiplied by 6 mice/group.

(E, F) Quantification of the islet number (E) and islet area (F) per pancreatic section in HFD + STZ-induced T2D mice.  $n = 3$  sections/mouse multiplied by 9 mice/group.

Data represent the mean  $\pm$  SEM. Statistical analysis was conducted by Student's *t*-test. \*\* $p < 0.01$ , \*\*\* $p < 0.001$  vs. control.

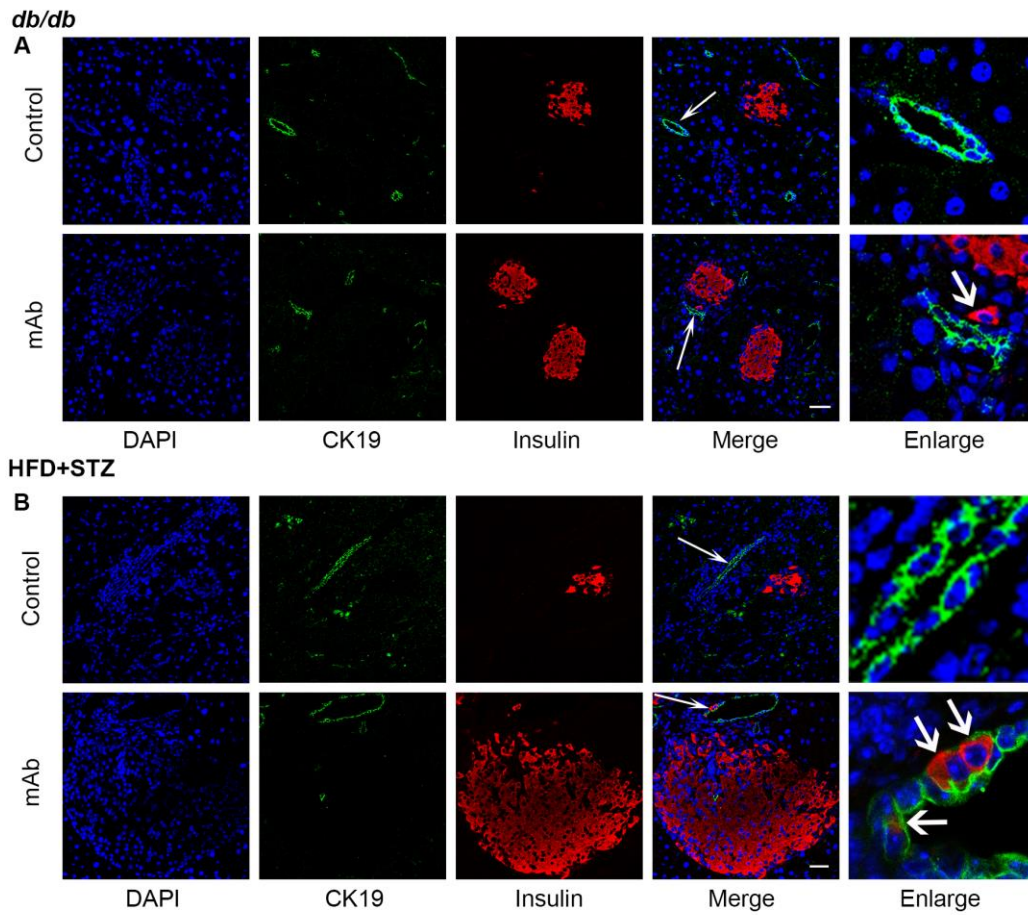

**Figure S3. Immunofluorescent analysis of duct-derived  $\beta$ -cell neogenesis in the pancreatic tissues of two T2D mouse models treated with GCGR mAb or IgG control, related to Figure 3.**

(A, B) Representative image of islets immunostained with cytokeratin 19 (CK19, a marker of mature duct cells) and insulin in the ductal region of *db/db* mice (A) and HFD + STZ-induced T2D mice (B). The cells indicated by the arrows are enlarged at right of the image. Scale bar = 50  $\mu$ m.

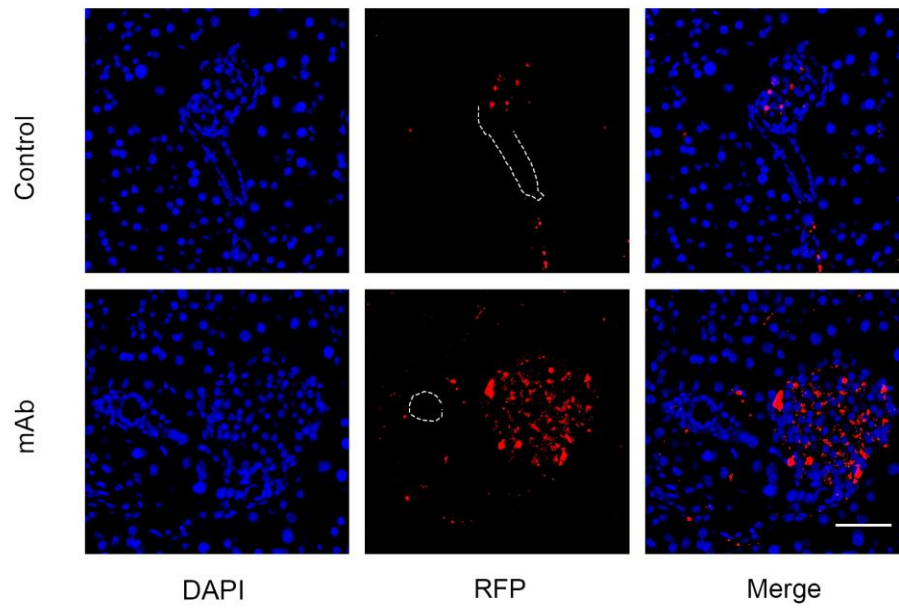

**Figure S4. Immunofluorescent analysis of RFP (progenitor lineage-tracing marker) positive cells located within or near pancreatic ducts in the Ngn3<sup>+</sup> cell lineage-tracing T2D mice treated with GCGR mAb or IgG control for 4 weeks, related to Figure 3.**

The ductal lumen is outlined with dashed lines. Scale bar = 50  $\mu$ m.

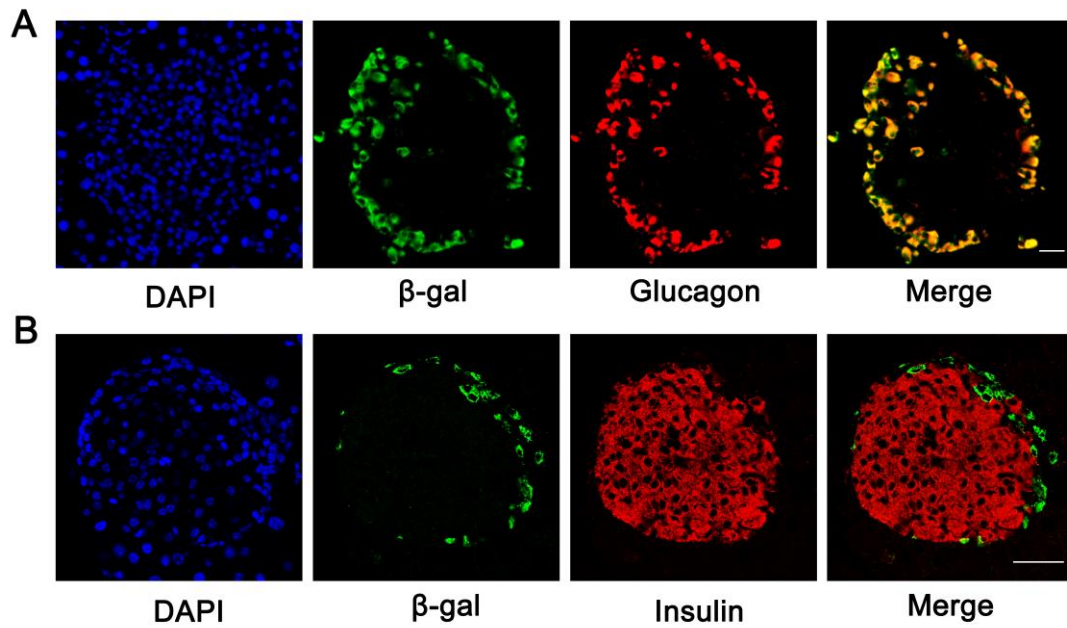

**Figure S5. Identification of the tracing efficiency in the 3-month-old pancreatic  $\alpha$ -cell lineage-tracing (*glucagon-cre- $\beta$ -gal*) mice fed on normal diet, related to Figure 4 and 5.**

(A) Representative image of an islet immunostained with  $\beta$ -gal ( $\alpha$ -cell lineage-tracing marker) and glucagon.

(B) Representative image of an islet immunostained with  $\beta$ -gal and insulin.

Scale bar = 50  $\mu$ m.

*db/db*

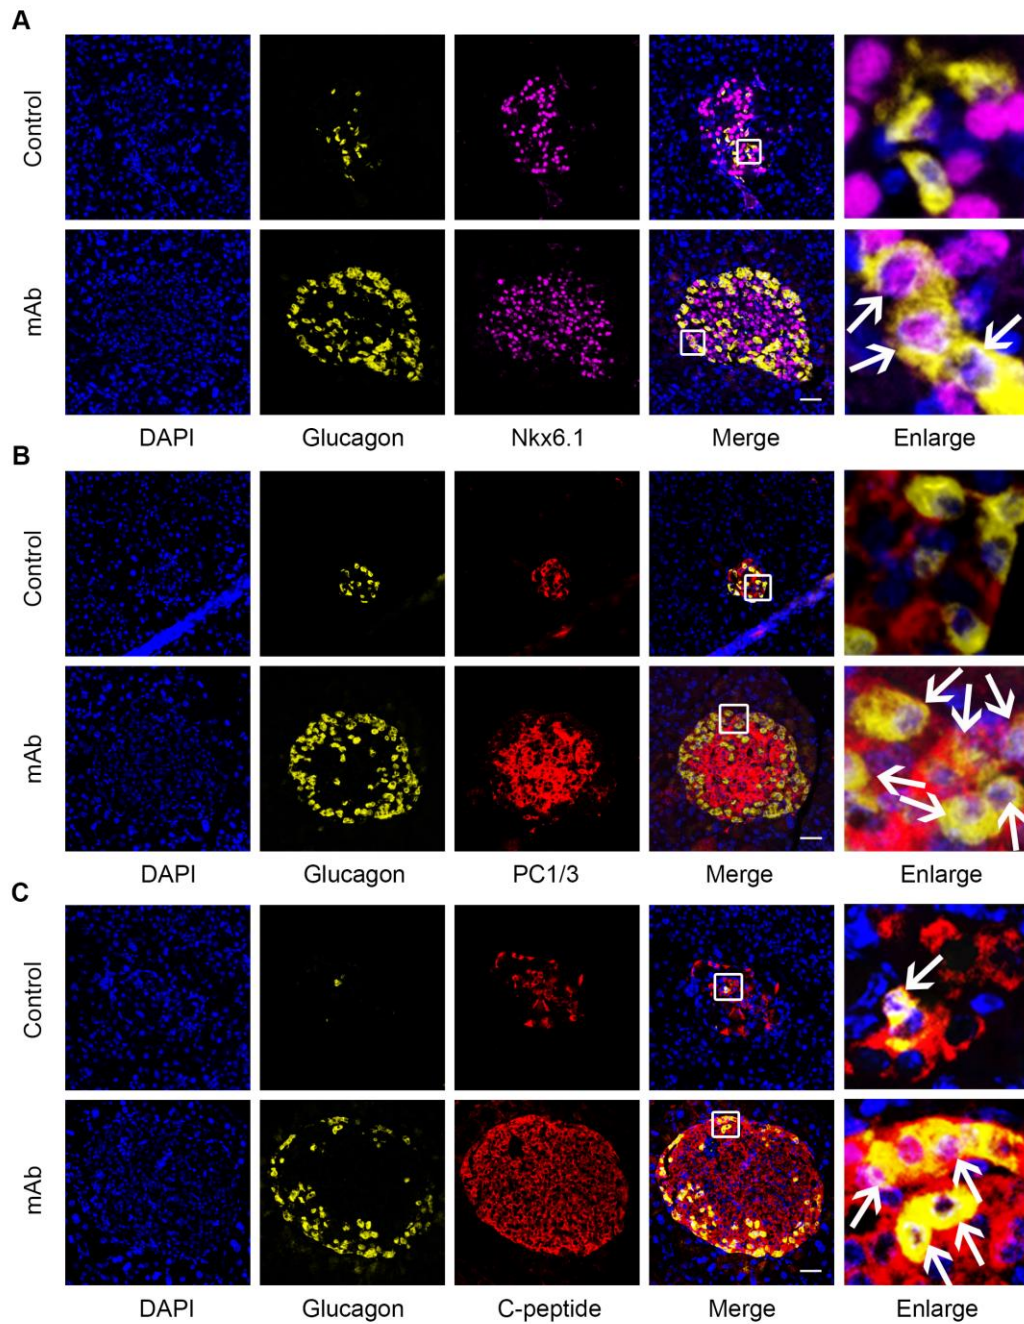

**Figure S6. Immunofluorescent analysis of  $\alpha$ -to- $\beta$  cell conversion in the pancreatic tissues of *db/db* mice treated with GCGR mAb or IgG control for 4 weeks, related to Figure 5.**

(A) Representative photograph of an islet immunolabeled with glucagon and Nkx6.1, a transcription factor that participates in  $\beta$ -cell development and function.

(B) Representative photograph of an islet immunolabeled with glucagon and PC1/3, an enzyme essential for processing proinsulin to insulin in  $\beta$ -cells.

(C) Representative photograph of an islet immunolabeled with glucagon and C-peptide.

The arrows indicate co-labeled cells. The cells in the small box are enlarged at right of the image. Scale bar = 50  $\mu$ m.

## HFD+STZ

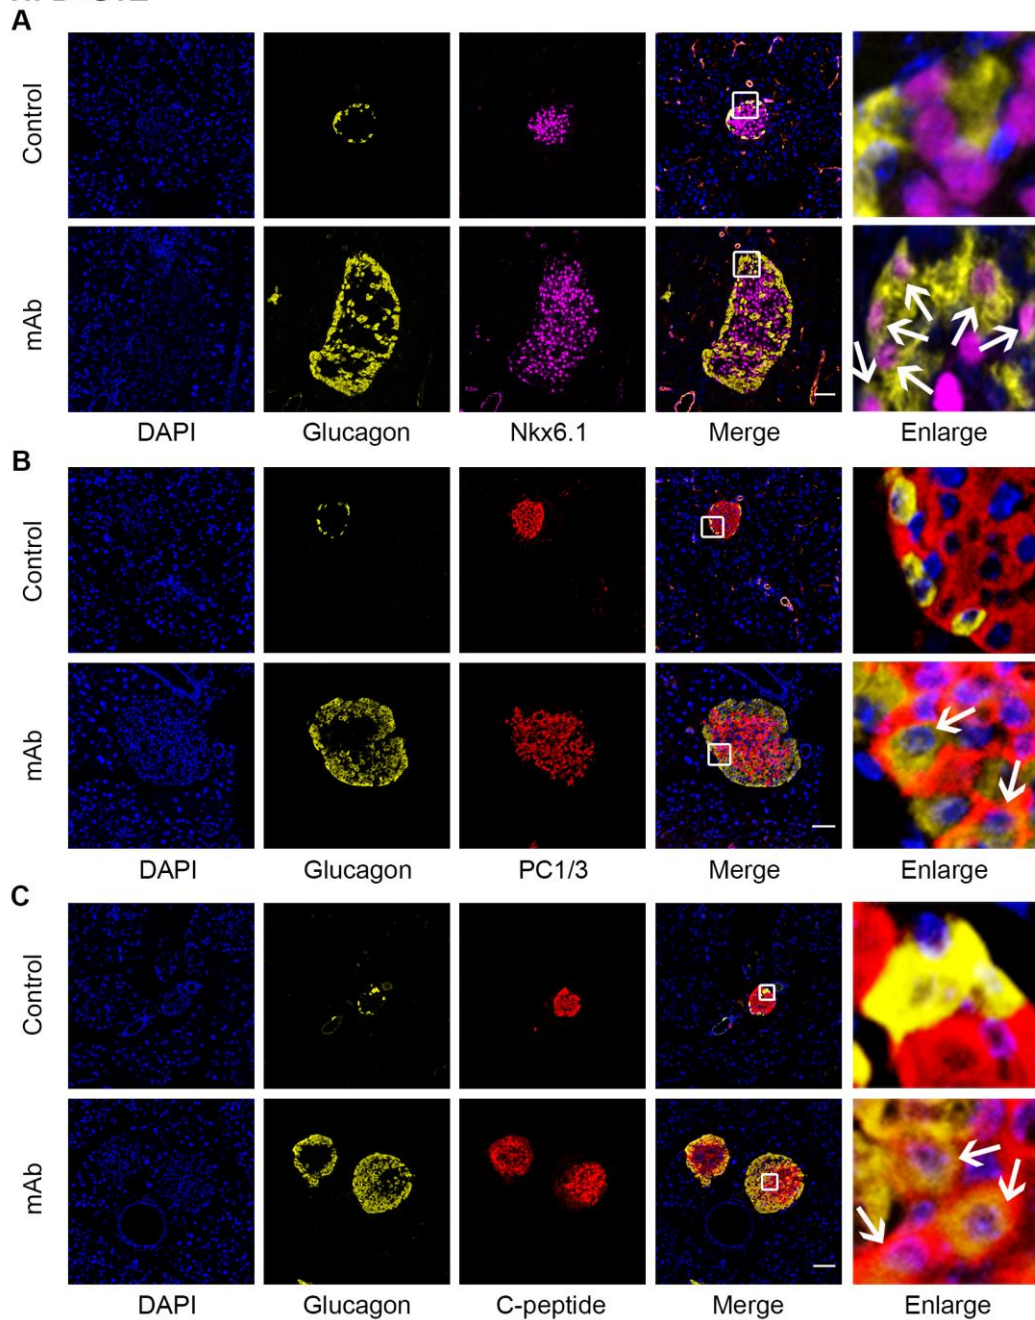

**Figure S7. Immunofluorescent analysis of  $\alpha$ -to- $\beta$  cell conversion in the pancreatic tissues of HFD + STZ-induced T2D mice treated with GCGR mAb or IgG control for 4 weeks, related to Figure 5.**

(A) Representative photograph of an islet immunolabeled with glucagon and Nkx6.1.

(B) Representative photograph of an islet immunolabeled with glucagon and PC1/3.

(C) Representative photograph of an islet immunolabeled with glucagon and C-peptide.

The arrows indicate co-labeled cells. The cells in the small box are enlarged at right of the image. Scale bar = 50  $\mu$ m.



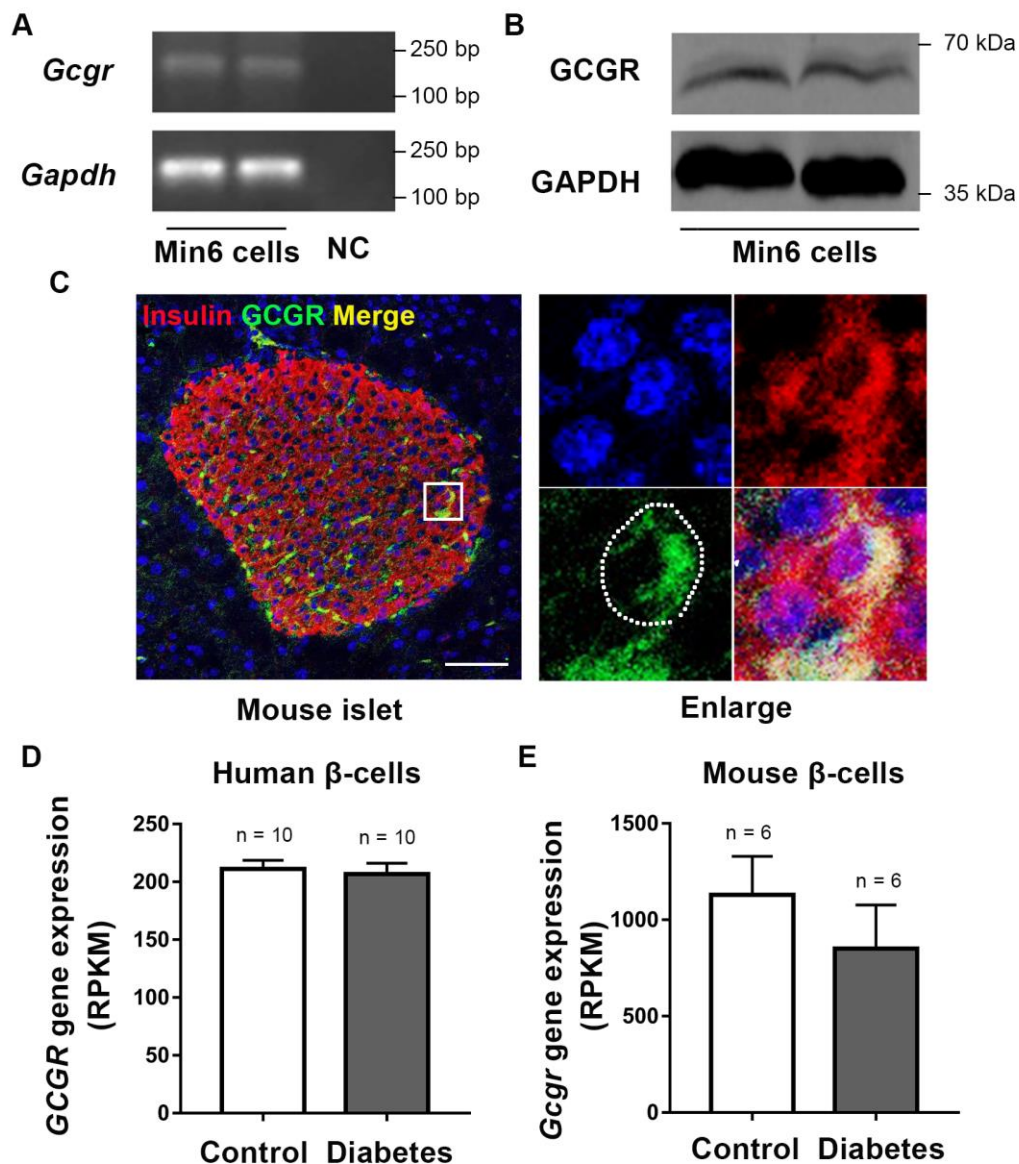

**Figure S8. GCGR expression in pancreatic  $\beta$ -cells, related to Figure 6.**

(A) The mRNA expression of *Gcgr* in the mouse pancreatic  $\beta$ -cell line Min6 cells was detected by RT-PCR. NC, negative control.

(B) The protein expression of GCGR in Min6 cells was detected by western blot.

(C) Representative image of an islet immunostained for GCGR and insulin in the normal control *db/m* mice. The cells in the small box are enlarged at right of the image. One co-labeled cell is outlined with dashed line. Scale bar = 50  $\mu$ m.

(D, E) *GCGR* expression in human (D) and mouse (E)  $\beta$ -cells isolated from T2D and control pancreata. The original data were from the datasets GSE20966 (D) and GSE168743 (E). Data represent the mean  $\pm$  SEM. Statistical analysis was conducted by Student's *t*-test.

**Table S1. Quantitative RT-PCR primers used for mRNA expression analysis, related to STAR Methods.**

| Gene symbol  | Gene name                                     | Species | Gene ID | Primer sequences (5'-3')                               | Tm (°C) | Product length (bp) |
|--------------|-----------------------------------------------|---------|---------|--------------------------------------------------------|---------|---------------------|
| <i>Gcg</i>   | glucagon                                      | Mouse   | 14526   | F: TTCATCTCATCAGGGTCCTC<br>R: GCTTATAATGCTGGTGCAAG     | 60      | 114                 |
| <i>Pcsk1</i> | proprotein convertase subtilisin/kexin type 1 | Mouse   | 18548   | F: AGTTGGAGGCATAAGAATGCTG<br>R: GCCTTCTGGGCTAGTCTGC    | 60      | 159                 |
| <i>Pcsk2</i> | proprotein convertase subtilisin/kexin type 2 | Mouse   | 18549   | F: GTGTGATGGTTTTTGCCTCTG<br>R: GGGAGCTTTCGGACTCCAA     | 59      | 130                 |
| <i>Ins1</i>  | insulin I                                     | Mouse   | 16333   | F: TAGTGACCAGCTATAATCAGAG<br>R: ACGCCAAGGTCTGAAGGTCC   | 62      | 289                 |
| <i>Ins2</i>  | insulin II                                    | Mouse   | 16334   | F: CCCTGCTGGCCCTGCTCTT<br>R: AGGTCTGAAGGTCACCTGCT      | 60      | 213                 |
| <i>Pdx1</i>  | pancreatic and duodenal homeobox 1            | Mouse   | 18609   | F: AGGAAAACAAGAGGACCCCGT<br>R: CTCATGCGACGGTTTTGGA     | 59      | 170                 |
| <i>Ngn3</i>  | neurogenin 3                                  | Mouse   | 11925   | F: GTCGGGAGAAGTAGGATGGC<br>R: GGAGCAGTCCCTAGGTATG      | 56      | 156                 |
| <i>Actb</i>  | actin, beta                                   | Mouse   | 11461   | F: TGTACCCAGGCATTGCTGAC<br>R: CTGCTGGAAGGTGGACAGTG     | 60      | 149                 |
| <i>Gcgr</i>  | glucagon receptor                             | Mouse   | 14527   | F: ATTGGCGATGACCTCAGTGTGA<br>R: GCAATAGTTGGCTATGATGCCG | 60      | 105                 |
| <i>Gapdh</i> | glyceraldehyde-3-phosphate dehydrogenase      | Mouse   | 14433   | F: TGCACCACCAACTGCTTAGC<br>R: GGCATGGACTGTGGTCATGAG    | 61      | 87                  |

Abbreviations: Tm, temperature; bp, base pair.
